# Supplementary material
Source: publisher site journal article supplement (https://www.dovepress.com/article/557154)
Supplement: Supplementary file 1 [file 557154%20Revised%20%2509Supplementary%20Material.docx]

**Supplementary Material:**


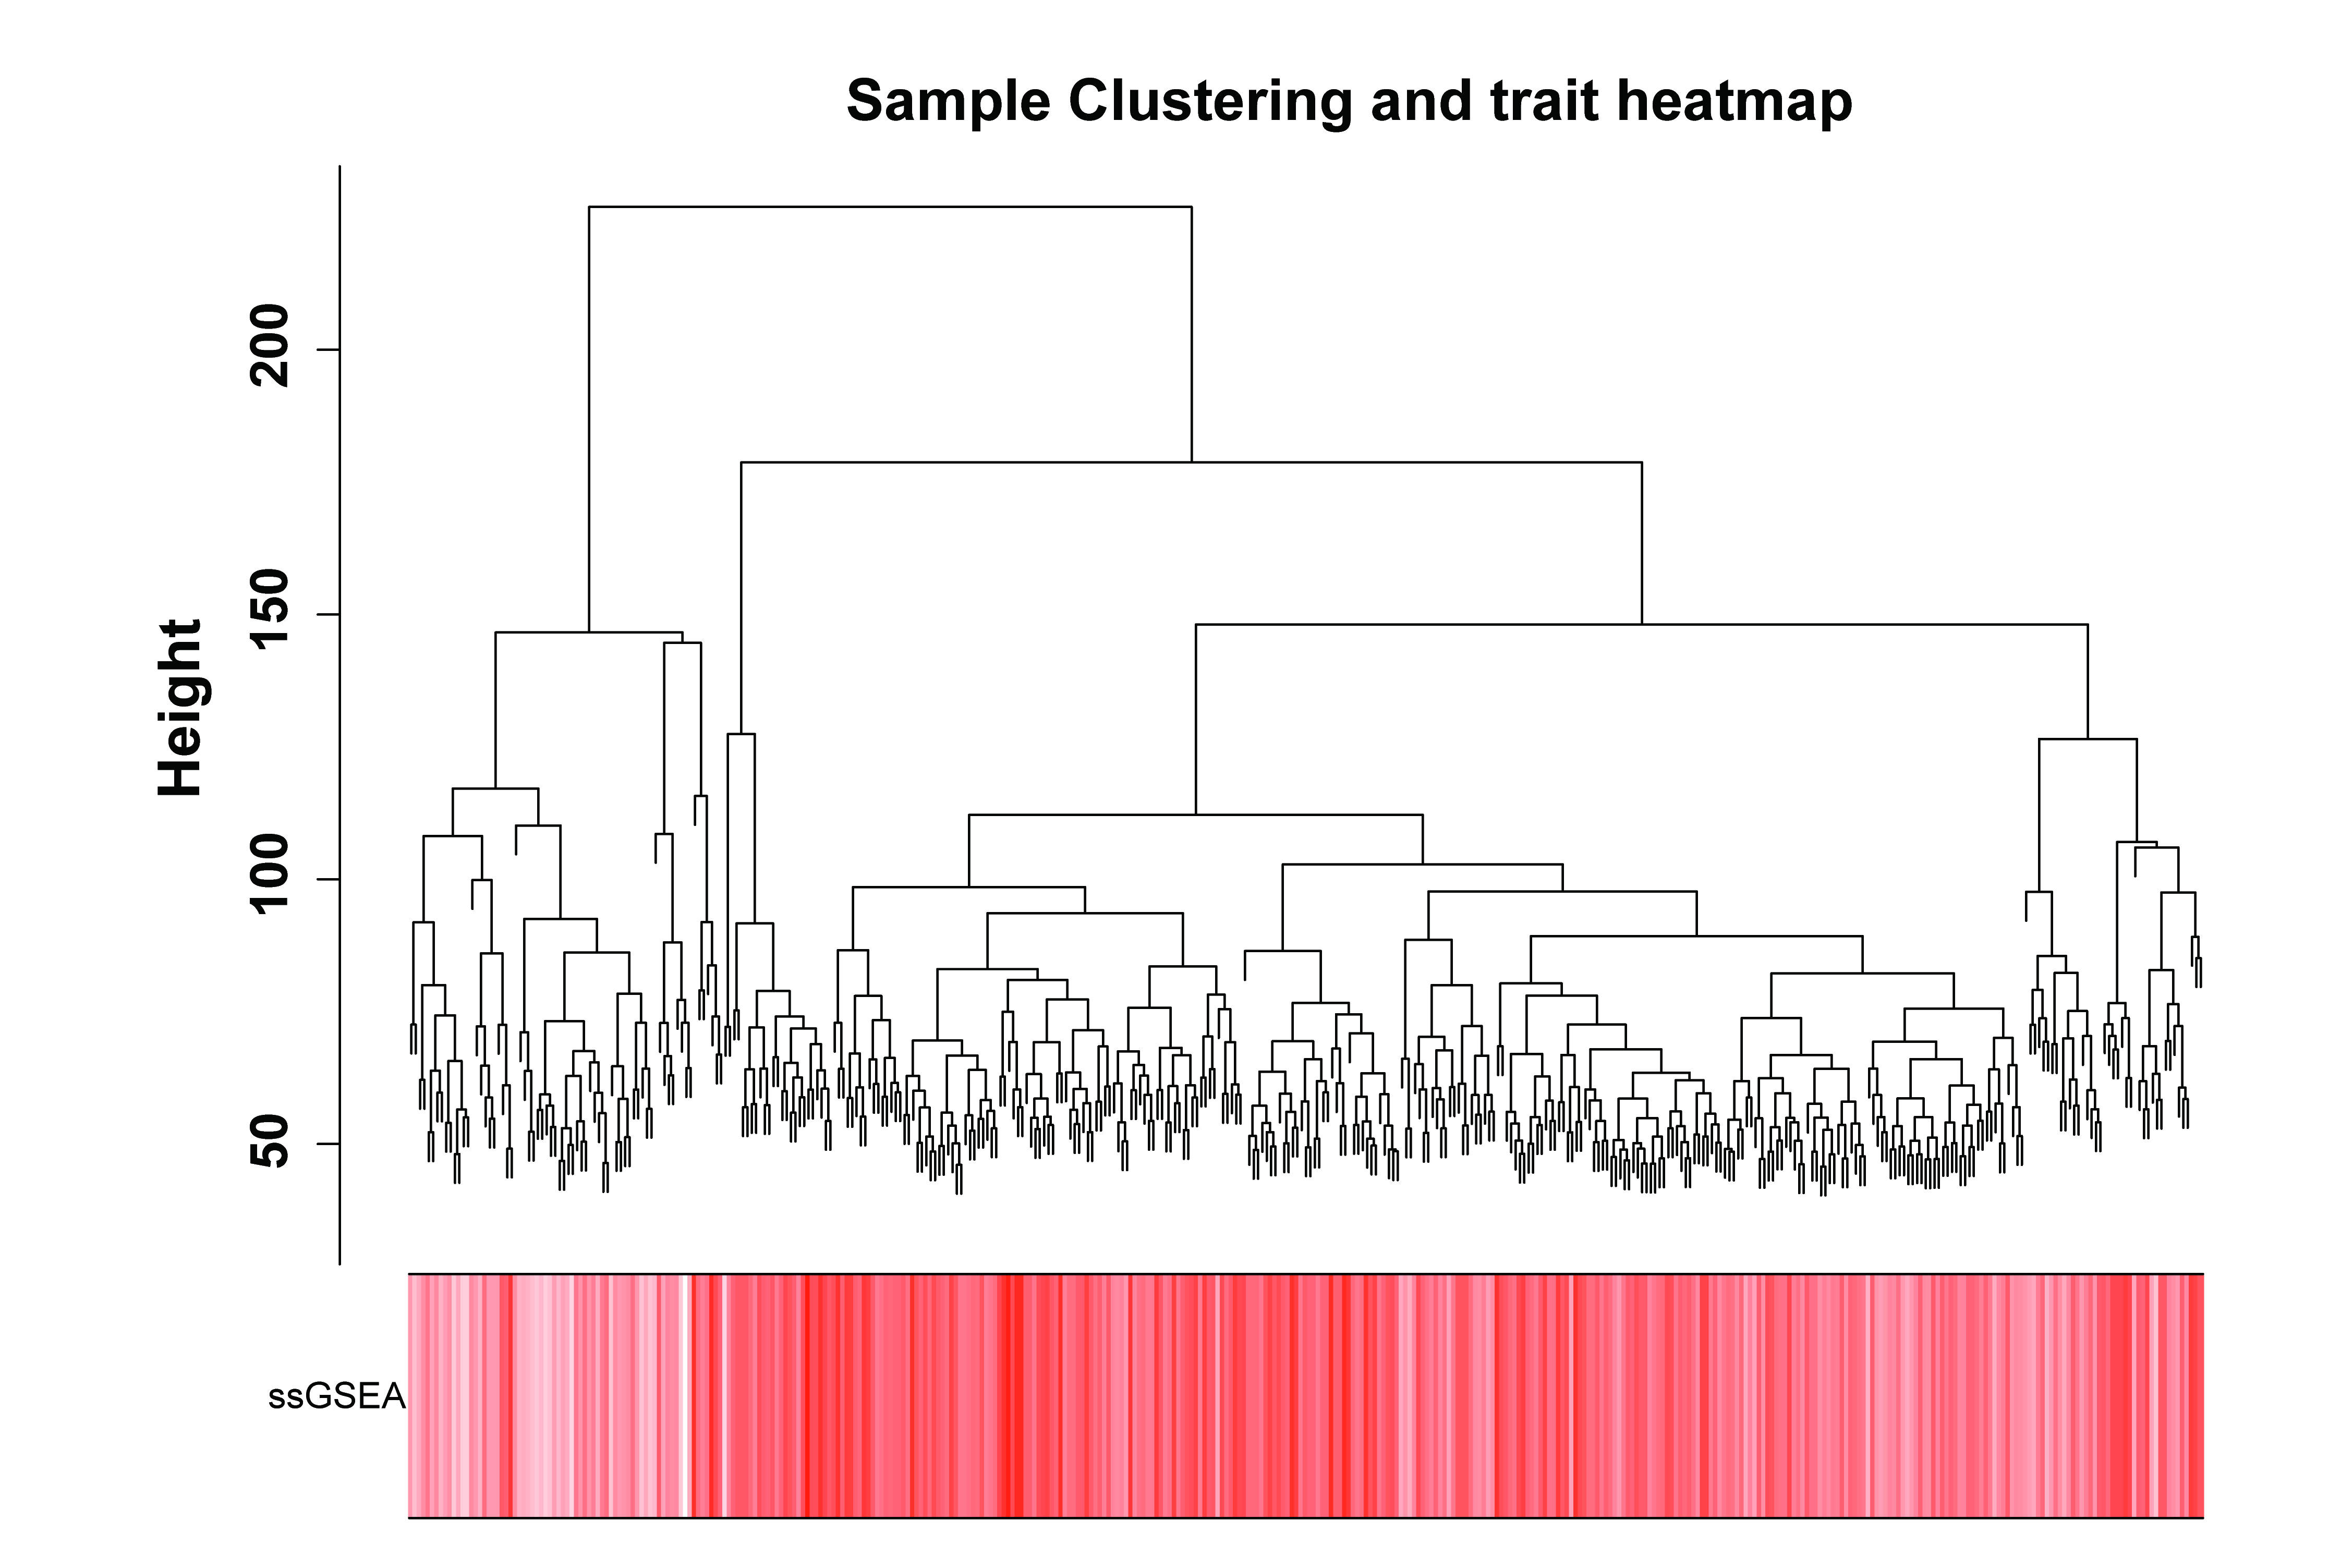


**Figure S1.** The sample-level clustering graph of the GSE69683 dataset. Each branch in the clustering tree represents a sample, and the vertical coordinate represents the Euclidean distance of the sample expression.
